# Supplementary figures and images for: Palbociclib versus abemaciclib in HR+/HER2- advanced breast cancer: an indirect comparison of patient-reported end points
Source: Atypon-hosted journal article supplement (doi:10.2217/cer-2021-0221), 2021-11-09

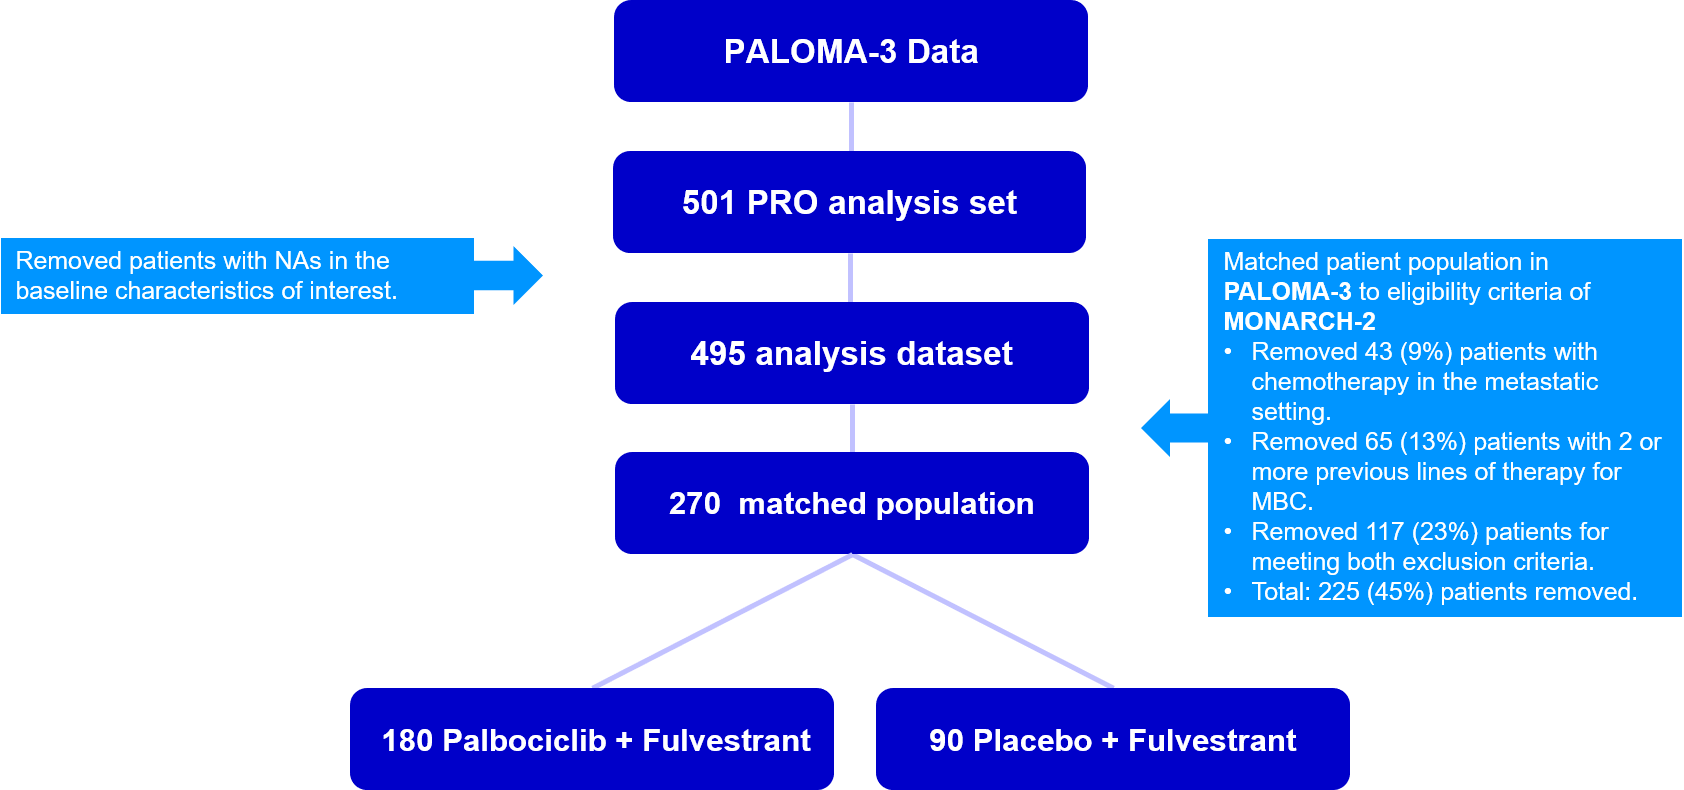

Supplement: supplementary figure 2.docx [file supplementary%20figure%202.docx]
